# Supplementary material for: Cu(ii)-Porphyrin based near-infrared molecules: synthesis, characterization and photovoltaic application
Source: Royal Society of Chemistry journal article supplement (doi:10.1039/d0nj04800c), 2020-12-15
Supplement: d0nj04800c1.pdf [file d0nj04800c1.pdf]

## Electronic Supplementary Information (ESI)

Cu(II)-Porphyrin based Near-infrared Molecules: Synthesis,  
Characterization and Photovoltaic Application

Renlong Li<sup>\*a</sup>, Yongqiang Yuan<sup>a</sup>, Lei Liang<sup>a</sup>, Jianfeng Lu<sup>a</sup>, Cheng-Xing Cui<sup>a</sup>,  
Hongying Niu<sup>a</sup>, Zerun Wu<sup>b</sup>, Gongchu Liu<sup>b</sup>, Zhicheng Hu<sup>b</sup>, Ruihao Xie<sup>c</sup>, Fei Huang<sup>b</sup>  
and Yuping Zhang<sup>\*a</sup>

*<sup>a</sup>School of Chemistry and Chemical Engineering, Henan Institute of Science and  
Technology, Xinxiang 453003, P. R. China. E-mail: rlli@hist.edu.cn;  
zhangyuping@hist.edu.cn*

*<sup>b</sup>State Key Laboratory of Luminescent Materials and Devices, Institute of Polymer  
Optoelectronic Materials and Devices, South China University of Technology,  
Guangzhou 510640, P. R. China.*

*<sup>c</sup>School of Optoelectronic Engineering, Guangdong Polytechnic Normal University,  
Guangzhou, 510665, P. R. China.*

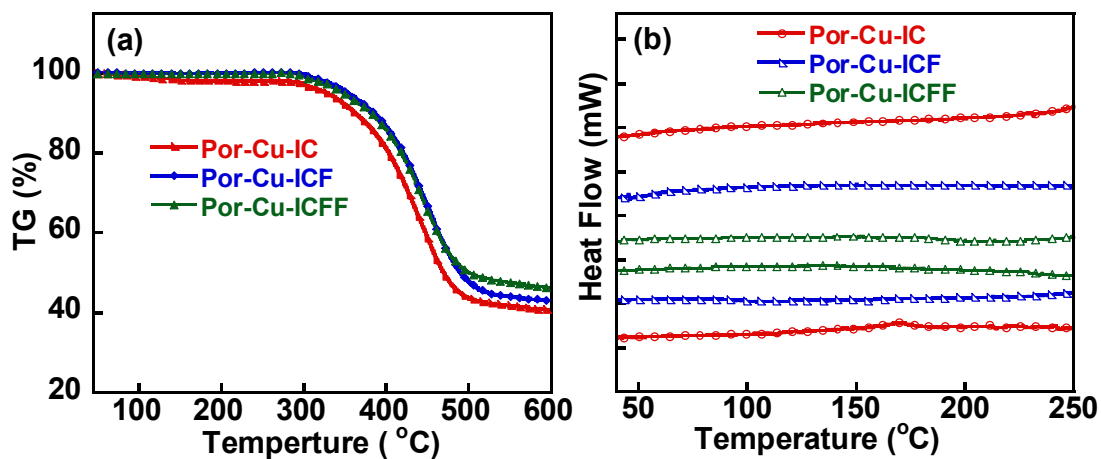

Fig. S1. The TG and DSC curves of the three porphyrin-based acceptors.

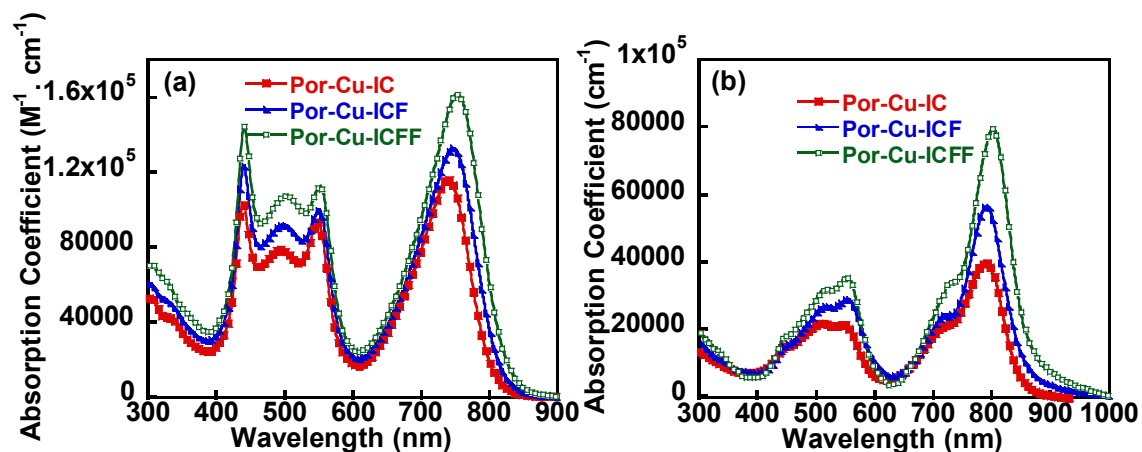

Fig. S2. UV-vis absorption coefficient spectra of the two acceptors in chloroform solution (a) and in the film state (b).

Table S1. Optical properties of the three porphyrin-based acceptors.

| Acceptors   | UV-vis in solution         |                                    |                                                  | UV-vis as thin films       |                                    |                              |                                   |
|-------------|----------------------------|------------------------------------|--------------------------------------------------|----------------------------|------------------------------------|------------------------------|-----------------------------------|
|             | $\lambda_{\max}/\text{nm}$ | $\lambda_{\text{onset}}/\text{nm}$ | $\epsilon (10^5 \text{ M}^{-1} \text{ cm}^{-1})$ | $\lambda_{\max}/\text{nm}$ | $\lambda_{\text{onset}}/\text{nm}$ | $E_g^{\text{opt}}/\text{eV}$ | $\epsilon (10^5 \text{ cm}^{-1})$ |
| Por-Cu-IC   | 737                        | 820                                | 1.16                                             | 788                        | 864                                | 1.44                         | 0.39                              |
| Por-Cu-ICF  | 746                        | 828                                | 1.33                                             | 790                        | 880                                | 1.41                         | 0.56                              |
| Por-Cu-ICFF | 754                        | 838                                | 1.61                                             | 804                        | 898                                | 1.38                         | 0.79                              |

**Table S2.** Photovoltaic properties of the OSCs based on PBDB-T as donor and Por-Cu-IC or Por-Cu-ICF or Por-Cu-ICFF as the acceptor under AM 1.5 G at 100 mW cm<sup>-2</sup>.

| Acceptor                    | D:A (w/w) | Py additive | $V_{OC}$ (V) | $J_{SC}$ (mA cm <sup>-2</sup> ) | $FF$ (%) | $PCE$ (%) |
|-----------------------------|-----------|-------------|--------------|---------------------------------|----------|-----------|
| Por-Cu-ICFF                 | 1.5:1     | w/o         | 0.76         | 6.09                            | 36.37    | 1.69      |
| Por-Cu-ICFF                 | 1:1       | w/o         | 0.76         | 5.97                            | 39.27    | 1.79      |
| Por-Cu-ICFF                 | 1:1.5     | w/o         | 0.76         | 5.79                            | 38.98    | 1.71      |
| Por-Cu-ICFF                 | 1:1       | 0.5 %       | 0.79         | 7.30                            | 42.37    | 2.44      |
| Por-Cu-ICFF                 | 1:1       | 1 %         | 0.79         | 5.89                            | 43.36    | 2.01      |
| Por-Cu-ICF                  | 1:1       | 0.5 %       | 0.81         | 5.03                            | 45.66    | 1.85      |
| Por-Cu-IC                   | 1:1       | 0.5 %       | 0.82         | 1.58                            | 39.81    | 0.52      |
| Por-Cu-ICFF<br>: ITIC (1:1) | 1:1       | 0.5%        | 0.82         | 7.82                            | 46.71    | 3.13      |

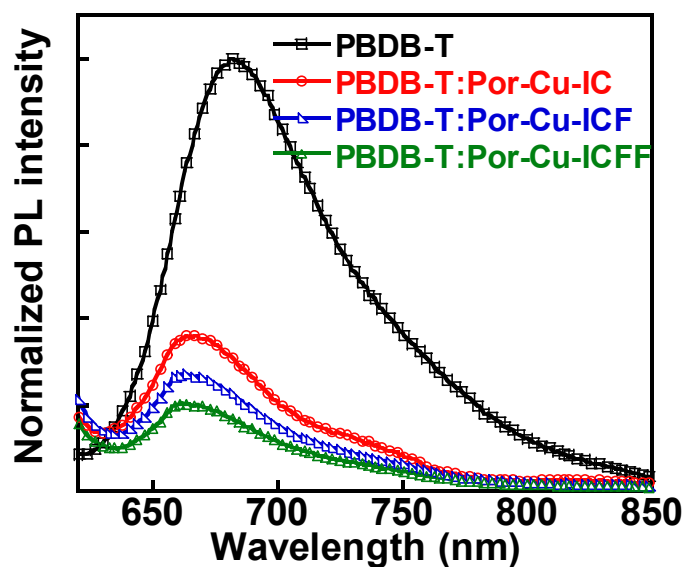

**Fig. S3.** PL spectra of thin films: PBDB-T, PBDB-T: Por-Cu-IC, PBDB-T: Por-Cu-ICF and PBDB-T: Por-Cu-ICFF, (1:1, with 0.5% pyridine)

**Table S3.** Electron/hole mobility for PBDB-T: acceptor blend films.

| Film                | $\mu_e$ (cm <sup>2</sup> V <sup>-1</sup> s <sup>-1</sup> ) | $\mu_h$ (cm <sup>2</sup> V <sup>-1</sup> s <sup>-1</sup> ) | $\mu_h/\mu_e$ |
|---------------------|------------------------------------------------------------|------------------------------------------------------------|---------------|
| PBDB-T: Por-Cu-IC   | $6.19 \times 10^{-6}$                                      | $3.76 \times 10^{-4}$                                      | 60.7          |
| PBDB-T: Por-Cu-ICF  | $8.34 \times 10^{-6}$                                      | $3.29 \times 10^{-4}$                                      | 39.4          |
| PBDB-T: Por-Cu-ICFF | $1.32 \times 10^{-5}$                                      | $2.85 \times 10^{-4}$                                      | 21.6          |

**Table S4.** Stability tests under continuous 1 sun illumination in ambient environment for the PBDB-T:Por-Cu-ICFF blend devices.

| Time (h) | $V_{OC}$ (V) | $J_{SC}$ (mA cm <sup>-2</sup> ) | $FF$ (%) | $PCE$ (%) |
|----------|--------------|---------------------------------|----------|-----------|
| 0        | 0.80         | 7.52                            | 43.70    | 2.64      |
| 1        | 0.80         | 7.23                            | 43.51    | 2.51      |
| 2        | 0.80         | 7.26                            | 43.22    | 2.52      |
| 5        | 0.80         | 7.34                            | 43.30    | 2.54      |
| 12       | 0.80         | 7.33                            | 41.71    | 2.45      |
| 24       | 0.80         | 7.11                            | 42.38    | 2.39      |
| 48       | 0.80         | 7.15                            | 41.17    | 2.35      |
| 72       | 0.80         | 7.06                            | 39.94    | 2.26      |

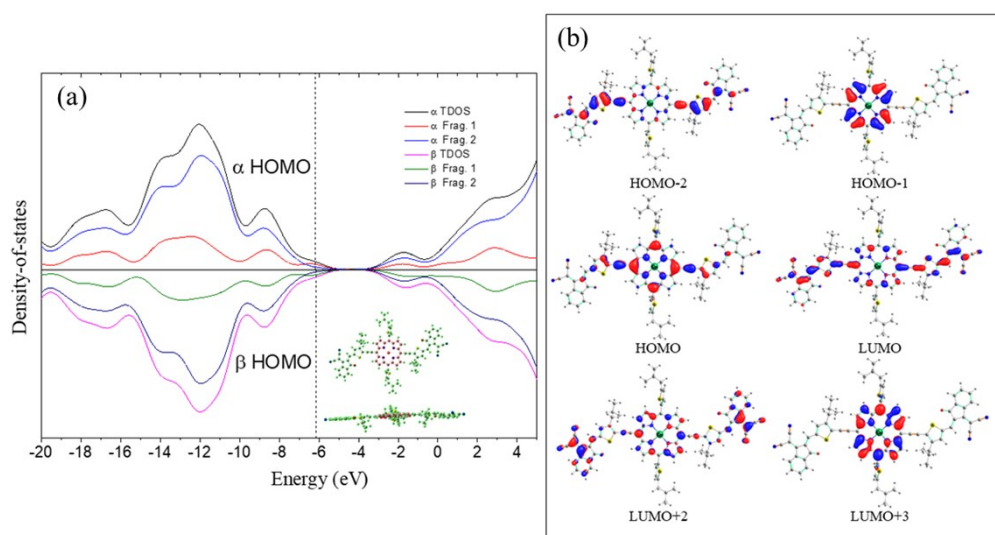

**Fig. S4** (a) The total density of states (TDOS) of alpha and beta spin of Por-Cu-IC, along with the partial DOSs (PDOS) of two fragments in Por-Cu-IC. The definition of the two fragments were shown as different colors (red for Frag. 1 and green for Frag. 2) in the lower right corner. The optimized molecular geometry of Por-Cu-IC was shown in the lower right corner. (b) The distributions of the highest occupied molecular orbital (HOMO) and the lowest unoccupied molecular orbital (LUMO), along with those of HOMO-2, HOMO-1, LUMO+2, and LUMO+3.

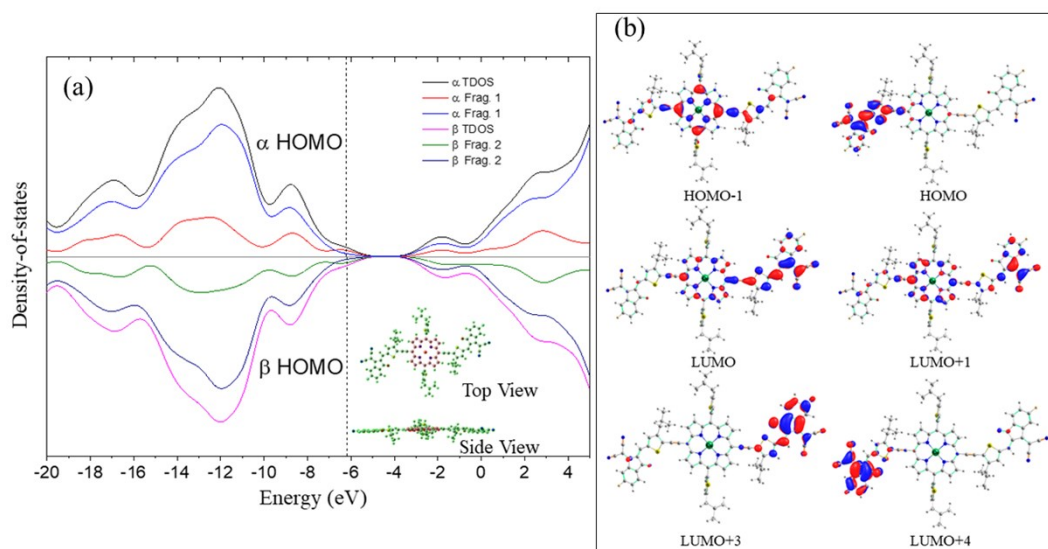

**Fig. S5** (a) The total density of states (TDOS) of alpha and beta spin of Por-Cu-ICF, along with the partial DOSs (PDOS) of two fragments in Por-Cu-ICF. The definition of the two fragments were shown as different colors (red for Frag. 1 and green for Frag. 2) in the lower right corner. The optimized molecular geometry of Por-Cu-ICF was shown in the lower right corner. (b) The distributions of the highest occupied molecular orbital (HOMO) and the lowest unoccupied molecular orbital (LUMO), along with those of HOMO-1, LUMO, LUMO+3, and LUMO+4.

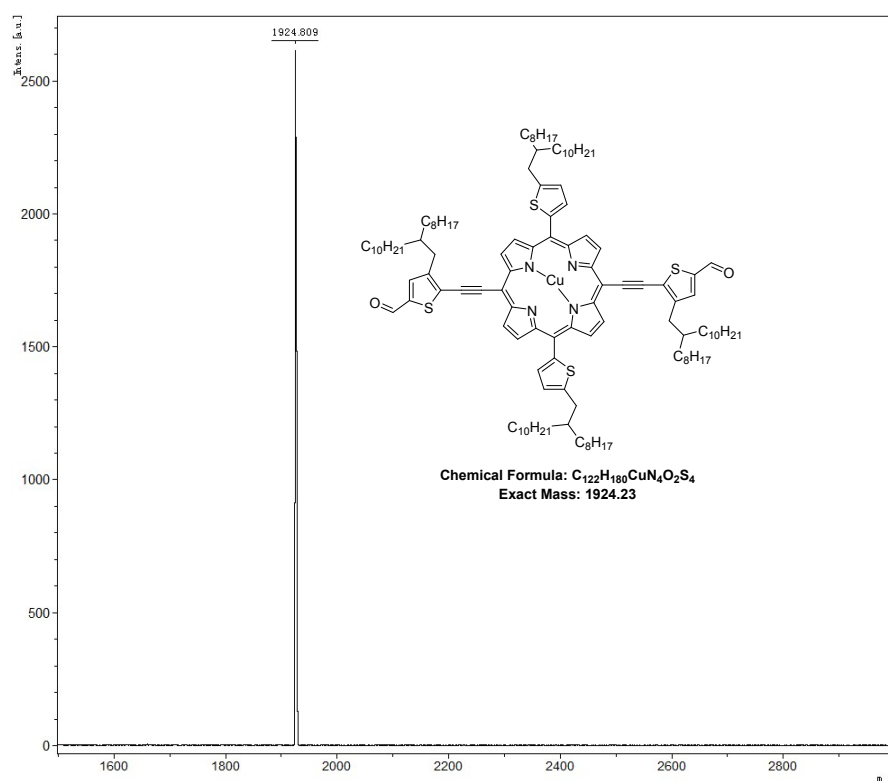

**Fig. S6.** Mass (MALDI-TOF) spectrum of **Por-Cu-CHO**.

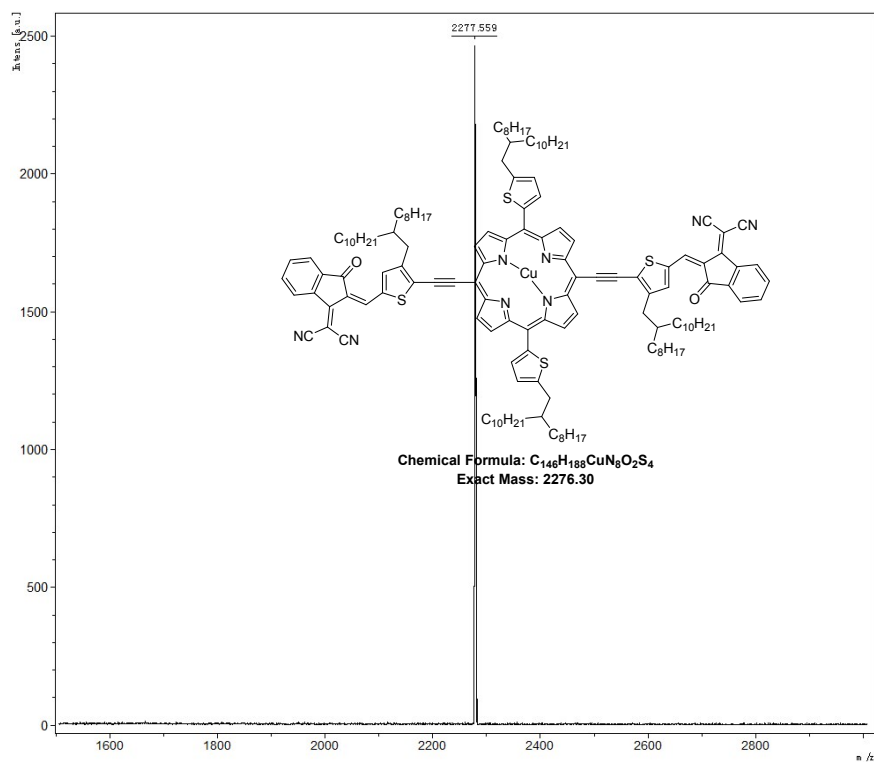

**Fig. S7.** Mass (MALDI-TOF) spectrum of **Por-Cu-IC**.

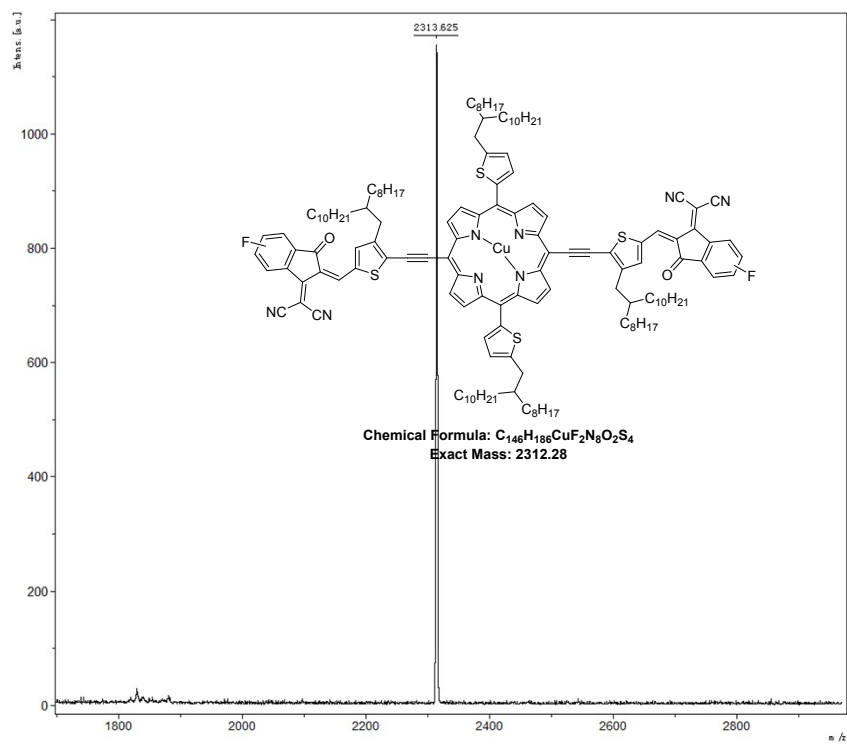

**Fig. S8.** Mass (MALDI-TOF) spectrum of **Por-Cu-ICF**.

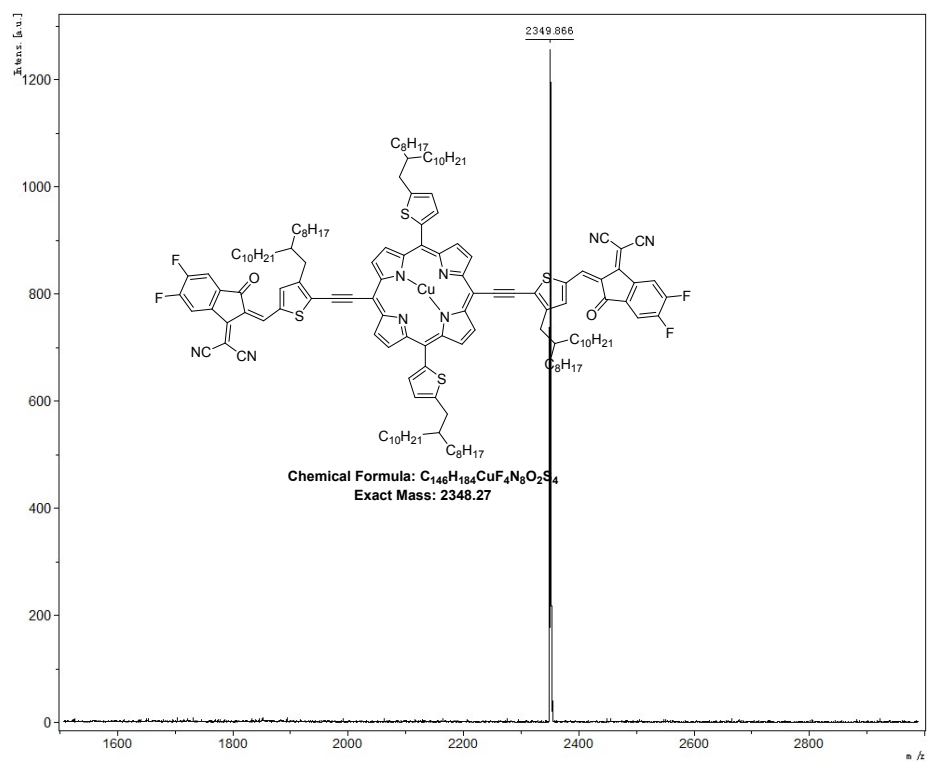

**Fig. S9.** Mass (MALDI-TOF) spectrum of **Por-Cu-ICFF**.
